# Supplementary material
Source: PubMed Central journal article supplement (PMC4977183)
Supplement: NIHMS3975-supplement-1.pdf [file NIHMS3975-supplement-1.pdf]

## Supplementary figures

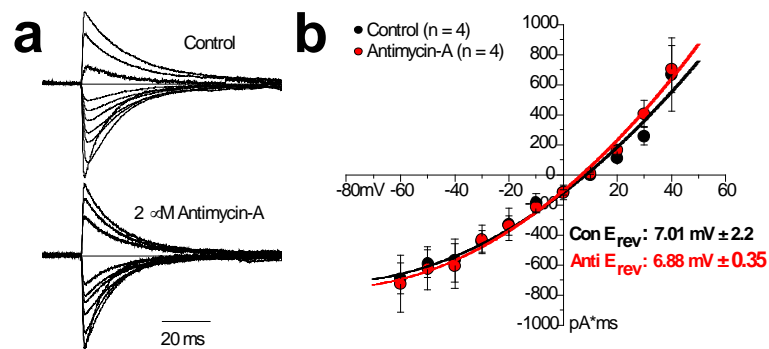

**Supplementary Figure 1. Antimycin-A does not shift the chloride equilibrium potential. (a)** Typical experiment showing averaged mIPSCs at a range of membrane potentials (range: -80 mV to +40 mV, 20 mV increments) in the presence (red circles, n = 4) or absence (black circles, n = 4) of 2  $\mu$ M antimycin-A. **(b)** Equilibrium potential for chloride ions (i.e.  $E_{Cl}$ ) estimated by measurement of the  $GABA_A$  receptor reversal potential from current-voltage relationships was similar in the presence (red circles,  $E_{rev}$ : + 6.88  $\pm$  0.35 mV,  $P$  = 0.96) or absence (black circles,  $E_{rev}$ : + 7.01  $\pm$  2.2 mV) of antimycin-A. Error bars,  $\pm$  s.e.m.

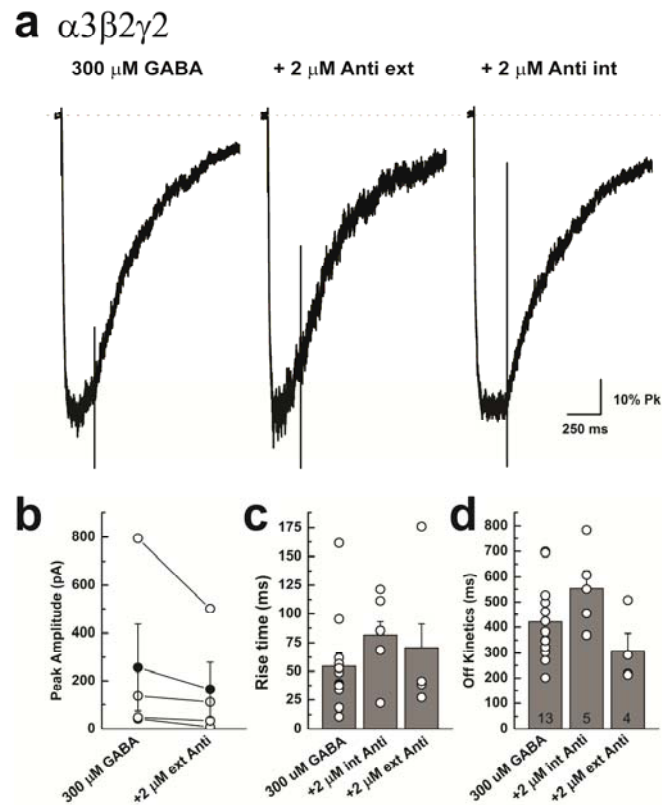

**Supplementary Figure 2. Antimycin-A does not directly affect  $\alpha 3\beta 2\gamma 2$  GABA<sub>A</sub> receptors.**

(a) Typical electrophysiological responses for  $\alpha 3\beta 2\gamma 2$  receptors evoked by 300  $\mu\text{M}$  GABA (250 ms). The left and middle panels show GABA responses before (left) and during (middle) external application of 2  $\mu\text{M}$  antimycin-A (patch # 130719p2). In the right panel, 2  $\mu\text{M}$  antimycin-A was included in the internal solution (patch # 130715p2). (b) Peak amplitudes for responses evoked by 300  $\mu\text{M}$  GABA (250 ms) before and during external application of 2  $\mu\text{M}$  antimycin-A. The slight decrease in amplitude is due to normal response rundown. Empty circles represent individual patches ( $n = 4$ ), black circles represent the mean. Error bars, s.e.m. (c, d) Bar graphs showing rise times (c) and off-kinetics (d) of individual patches (circles, 300  $\mu\text{M}$  GABA, 250 ms). Error bars, s.e.m. Numbers indicate the number of patches.

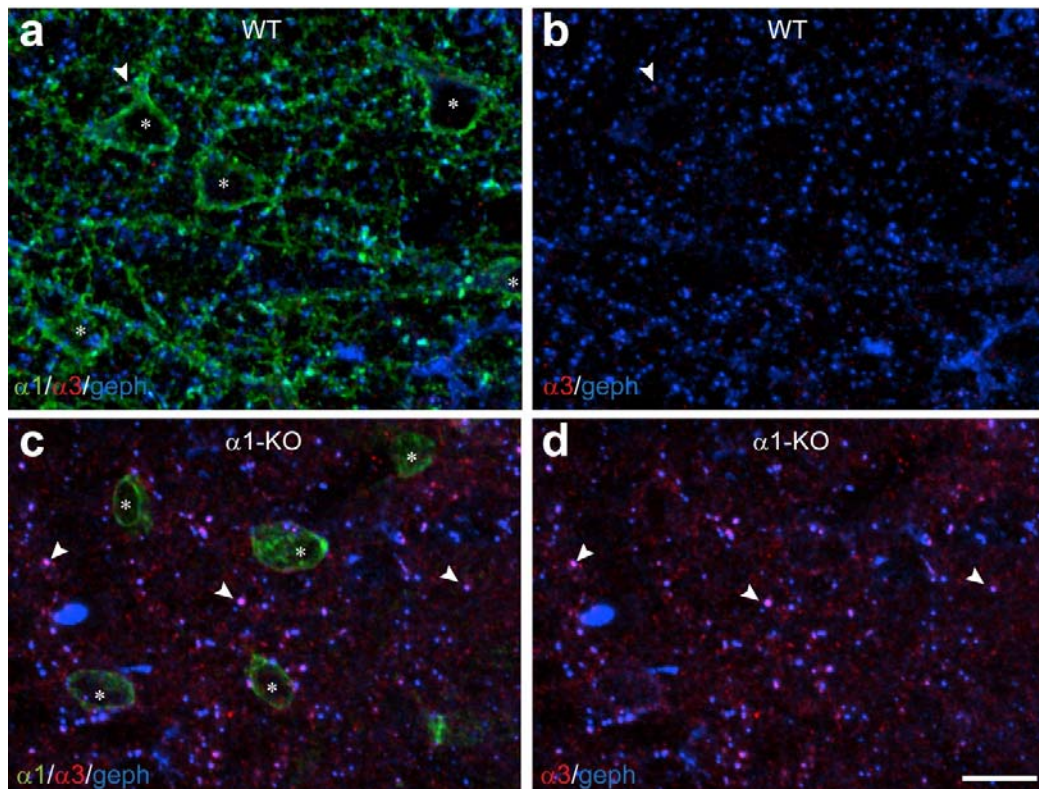

**Supplementary Figure 3.  $\alpha 3$ -containing GABA<sub>A</sub> receptors are more abundant at inhibitory synapses in  $\alpha 1$ -null mice.** (a and b) Triple immunofluorescence staining of the  $\alpha 1$ - (green) and  $\alpha 3$ - (red) GABA<sub>A</sub> receptor subunits with gephyrin (blue) in the molecular layer of the cerebellum of wild-type mice. Panels on the right show staining of the  $\alpha 3$  subunit and gephyrin only. Note that the intense  $\alpha 1$  subunit staining outlines the dendrites of stellate cells (\*) and Purkinje cells. Gephyrin clusters are co-localized with the  $\alpha 1$  subunit (cyan) with the  $\alpha 3$  subunit-immunofluorescence is nearly undetectable with the exception of a single cluster (arrowhead). (c and d) In  $\alpha 1$ -KO mice, loss of the  $\alpha 1$  subunit is compensated for by an increase in  $\alpha 3$  subunit-immunoreactivity which forms clusters with gephyrin (arrowheads). Some of these clusters are observed at the surface of stellate cell somata. Residual  $\alpha 1$  subunit staining represents truncated protein that forms an N-terminal epitope that is recognized by the antibody. Note the decreased density of gephyrin clusters compared to wild-type mice. Scale bar, 10  $\mu$ m.

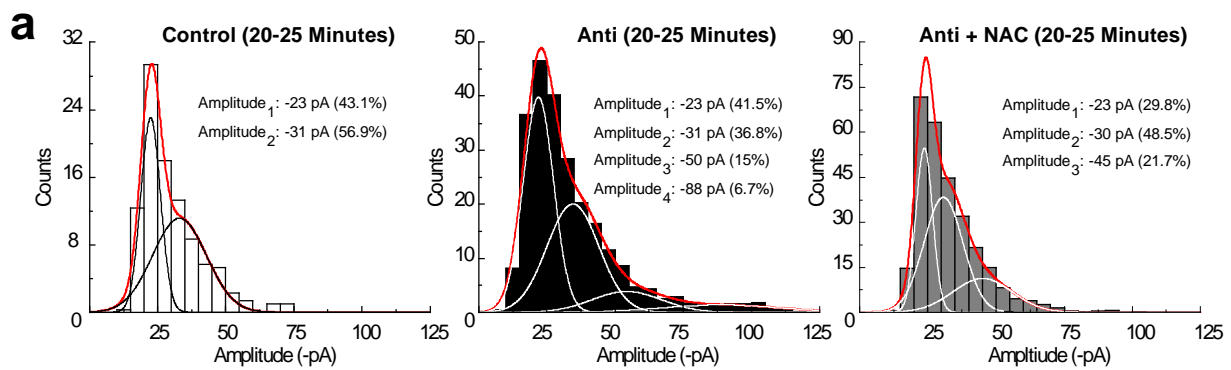

**Supplementary Figure 4. N-acetylcysteine inhibits the antimycin-A induced increase in mIPSC response amplitudes of  $\alpha 1$ -KO animals.** (a) Amplitude distributions of mIPSCs observed during the last 5 minutes (i.e. 20-25 minutes) of stellate cell recordings from  $\alpha 1$ -KO mice in the absence (left,  $n = 5$ ) and presence (middle,  $n = 5$ ) of  $2 \mu\text{M}$  antimycin-A (Anti) as well as in the concomitant presence of  $2 \mu\text{M}$  antimycin-A and  $1 \text{mM}$  N-acetylcysteine (NAC, right,  $n = 6$ ). Averaged data has been fit with the sum of 2 to 4 Gaussian functions (red line) with individual Gaussians shown in either black (left) or white (middle and right panels).

## Supplementary Table 1

### Kinetics of $\alpha 1\beta 2\gamma 2$ and $\alpha 3\beta 2\gamma 2$ GABA<sub>A</sub> receptors.

| 1 ms pulse                |            |      |   |        |     |       |   |        |     |       |   |        |     |    |
|---------------------------|------------|------|---|--------|-----|-------|---|--------|-----|-------|---|--------|-----|----|
| $\alpha 1\beta 2\gamma 2$ | Components | t1   | ± | s.e.m. | %A1 | t2    | ± | s.e.m. | %A2 | t3    | ± | s.e.m. | %A3 | n  |
| 10 mM                     | 2          | 2.3  | ± | n/a    | 45  | 55.4  |   | n/a    | 55  |       |   |        |     | 1  |
|                           | 3          | 3.1  | ± | 0.3    | 42  | 30.2  | ± | 2.9    | 30  | 152.9 | ± | 15.7   | 28  | 11 |
| 300 $\mu$ M               | 2          | 3.5  | ± | 0.5    | 45  | 86.5  |   | 11.2   | 55  |       |   |        |     | 2  |
|                           | 3          | 2.9  | ± | 0.2    | 40  | 29.5  | ± | 2.2    | 30  | 153.3 | ± | 9.5    | 30  | 14 |
| $\alpha 3\beta 2\gamma 2$ | Components | t1   | ± | s.e.m. | %A1 | t2    | ± | s.e.m. | %A2 | t3    | ± | s.e.m. | %A3 | n  |
| 10 mM                     | 2          | 40.2 | ± | n/a    | 23  | 1586  | ± | n/a    | 77  |       |   |        |     | 1  |
|                           | 3          | 2.9  | ± | 0.4    | 23  | 53.3  | ± | 13.0   | 23  | 728.1 | ± | 252.6  | 54  | 7  |
| 300 $\mu$ M               | 2          | 6.5  | ± | 1.7    | 36  | 258.5 | ± | 38.6   | 64  |       |   |        |     | 7  |
|                           | 3          | 2.3  | ± | n/a    | 30  | 22.7  | ± | n/a    | 17  | 393.5 | ± | n/a    | 53  | 1  |
| 250 ms pulse              |            |      |   |        |     |       |   |        |     |       |   |        |     |    |
| $\alpha 1\beta 2\gamma 2$ | Components | t1   | ± | s.e.m. | %A1 | t2    | ± | s.e.m. | %A2 | t3    | ± | s.e.m. | %A3 | n  |
| 10 mM                     | 2          | 3.9  | ± | 0.7    | 55  | 154.9 | ± | 33.5   | 45  |       |   |        |     | 4  |
|                           | 3          | 2.3  | ± | 0.3    | 37  | 17.6  | ± | 3.4    | 32  | 258.4 | ± | 61.1   | 31  | 6  |
| 300 $\mu$ M               | 2          | 4.2  | ± | 0.6    | 53  | 174.7 | ± | 70.2   | 47  |       |   |        |     | 8  |
|                           | 3          | 2.0  | ± | 0.3    | 23  | 15.3  | ± | 2.3    | 33  | 317.2 | ± | 90.1   | 45  | 9  |
| $\alpha 3\beta 2\gamma 2$ | Components | t1   | ± | s.e.m. | %A1 | t2    | ± | s.e.m. | %A2 | t3    | ± | s.e.m. | %A3 | n  |
| 10 mM                     | 1          | 133  | ± | 26     | 100 |       |   |        |     |       |   |        |     | 3  |
|                           | 2          | 14.1 | ± | 4.1    | 30  | 283.3 | ± | 101.3  | 70  |       |   |        |     | 5  |
